# Supplementary material for: Continuous ion-exchange resin catalysed esterification of eugenol for the optimized production of eugenyl acetate using a packed bed microreactor
Source: Royal Society of Chemistry journal article supplement (doi:10.1039/c5ra08457a), 2015-01-01
Supplement: c5ra08457a1.pdf [file c5ra08457a1.pdf]

**Performance evaluation of eugenyl acetate conversion in a fixed bed microreactor using the experimental conditions of Table 3.**

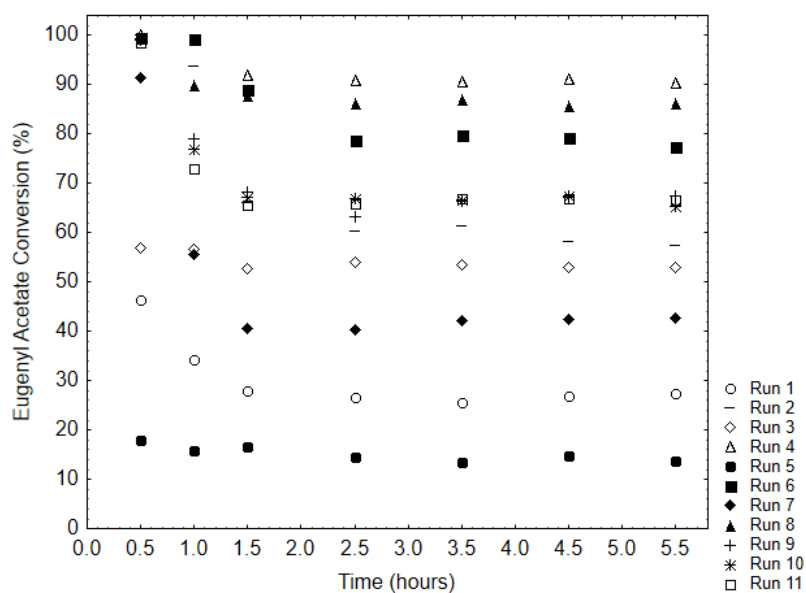

**Pareto chart of the effects of all independent studied variables on the eugenyl acetate production in a fixed bed microreactor ( $p < 0.05$ ). Experimental data and conditions shown in Table 3.**

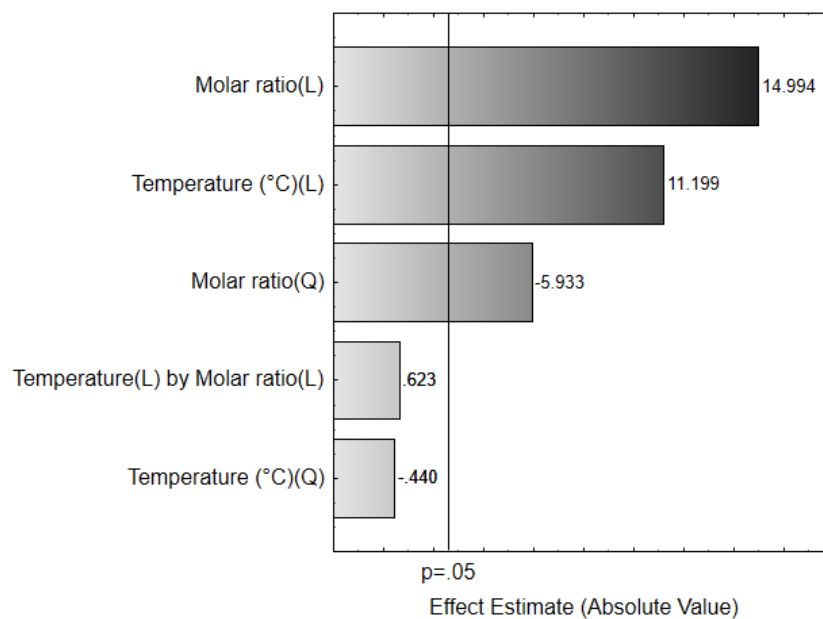

**ANOVA by 2<sup>2</sup> CCRD for eugenyl acetate conversion in fixed bed microreactor.**

| Source of variation | Sum of square | Degrees of freedom | Mean square | $F_{\text{calculated}}$ | $P$ -value   |
|---------------------|---------------|--------------------|-------------|-------------------------|--------------|
| Regression          | 5622.323      | 5                  | 1124.46     | 77.53                   | $9.8E^{-05}$ |
| Residue             | 72.510        | 5                  | 14.50       |                         |              |
| Lack of fit         | 72.485        | 3                  | 24.16       |                         |              |
| Pure error          | 0.025         | 2                  | 0.012       |                         |              |
| Total               | 5694.83       | 10                 |             |                         |              |

Regression coefficient:  $R=0.987$ ;  $F_{0.95;5;5} = 5.05$

Typical chromatogram of eugenol esterification reaction in a fixed bed microreactor, produced by gas chromatography.

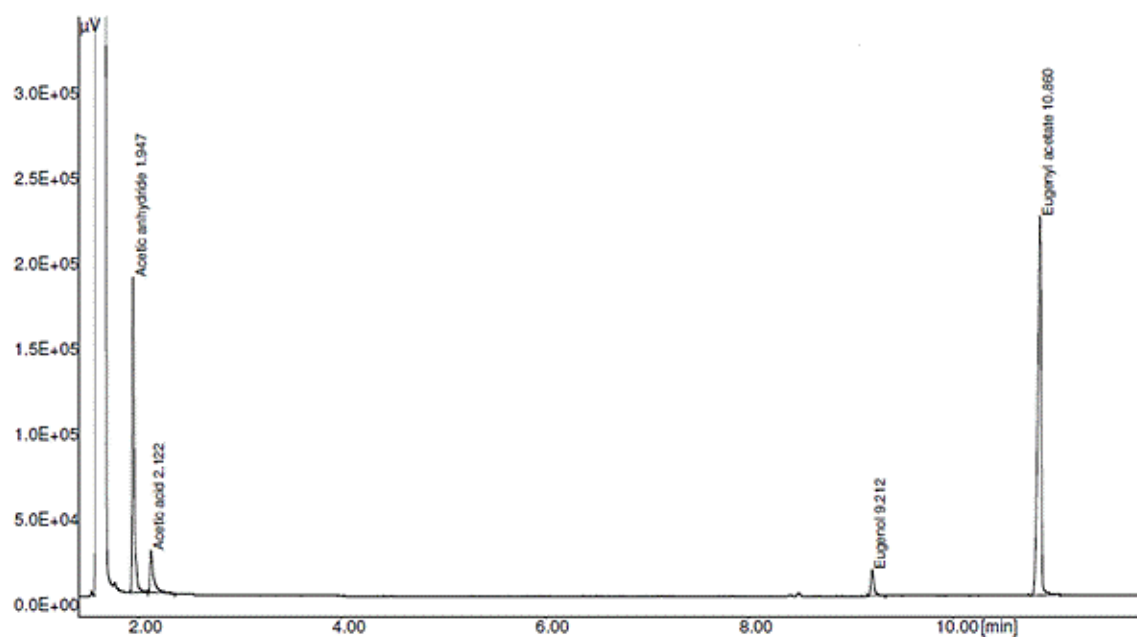

Gas Chromatograph (Carlo Erba, HRGC 5160), equipped with FID, manual injector and a fused capillary column MEGA-DEX DMP-Beta (Stationary Phase: Dimethyl pentyl- $\beta$ -Cyclodextrin, 0.25 mm i.d. x 0.15  $\mu$ m thickness x 25 m length, obtained from Mega s.n.c.). With the following temperature program: 100 - 200  $^{\circ}$ C at 10  $^{\circ}$ C/min, 200  $^{\circ}$ C for 3 min. Injection and detector temperatures were 200 and 250  $^{\circ}$ C, respectively. Helium was used as carrier gas (90 KPa).
